1 **Characterization of vaginal microbial enzymes identifies amylopullulanases that support**  
2 **growth of *Lactobacillus crispatus* on glycogen**

3 Benjamin M. Woolston<sup>\*1,2</sup>, Dominick J. Jenkins<sup>\*1</sup>, M. Indriati Hood-Pishchany<sup>3</sup>, Seth Rakoff  
4 Nahoum<sup>3</sup>, and Emily P. Balskus<sup>1#</sup>

5  
6 1. Department of Chemistry and Chemical Biology, Harvard University, Cambridge, MA 02138

7 2. Present address: Department of Chemical Engineering, Northeastern University, Boston, MA  
8 20115

9 3. Division of Infectious Diseases and Division of Gastroenterology, Department of Pediatrics,  
10 Boston Children's Hospital, Boston, MA 02115, USA; Department of Microbiology, Harvard  
11 Medical School, Boston, MA 02115, USA.

12 # corresponding author.

13  
14 **The healthy human vaginal microbiota is generally dominated by *Lactobacilli*, and the**  
15 **transition to a more diverse community of anaerobic microbes is associated with a number**  
16 **of health risks. While the mechanisms underlying the stability of *Lactobacillus*-dominated**  
17 **vaginal communities are not fully understood, competition for nutrients is a likely**  
18 **contributing factor. Glycogen secreted by epithelial cells is widely believed to support the**  
19 **growth of vaginal microbes. However, the mechanism by which bacteria access sugars**  
20 **from this complex polymer is unclear, with evidence to support a role for both microbial**  
21 **and human enzymes. To shed light on the potential contribution from microbial enzymes,**  
22 **here we biochemically characterize six glycogen-degrading enzymes predicted to be**  
23 **secreted by vaginal bacteria and confirm their ability to support the growth of an amylase-**  
24 **deficient strain of *L. crispatus* on glycogen. We reveal significant differences in the pH**  
25 **tolerance between enzymes from different organisms, suggesting the adaptation of**  
26 ***Lactobacilli* to an acidic vaginal environment. Using a simple assay specific for the**

27 **microbial enzymes, we confirm their presence in cervicovaginal lavage samples. Finally,**  
28 **we demonstrate the selective inhibition of glycogen-degrading enzymes from two vaginal**  
29 **microbes associated with dysbiosis. This work provides biochemical evidence to support**  
30 **the role of vaginal bacterial amylase enzymes in the breakdown of glycogen, providing**  
31 **insight into factors that shape the vaginal microbiota and highlighting the possibility of**  
32 **manipulating community structure via non-antibiotic small molecules.**

33 Dysbiosis within the human vaginal microbiota is associated with adverse health  
34 outcomes<sup>1</sup>. The bacterial composition of this community can be classified taxonomically based  
35 on 16S rRNA sequencing into one of five Community State Types (CSTs).<sup>2</sup> CST I-III and V are  
36 dominated by a single species of *Lactobacillus*: *L. crispatus*, *L. gasseri*, *L. iners*, or *L. jensenii*,  
37 respectively. CST-IV, by contrast, consists of a diverse group of anaerobic microbes, including  
38 species of *Gardnerella*, *Prevotella*, and *Mobiluncus*. The *Lactobacillus*-dominated CSTs are  
39 associated with a vaginal pH below 4.5, low Nugent scores, and low levels of inflammation<sup>3</sup>,  
40 whereas CST-IV is often associated with a higher pH and a number of health sequelae, including  
41 HIV acquisition<sup>4</sup>, bacterial vaginosis<sup>5</sup>, and preterm birth<sup>6</sup>. Thus, the prevailing view of the “healthy”  
42 vaginal bacterial community is one containing a high proportion of *Lactobacillus* species.  
43 However, it is important to note that CST IV is overrepresented in healthy Hispanic and Black  
44 women, and is not necessarily indicative of dysbiosis.<sup>7</sup> It has also recently been revealed that  
45 even CSTs dominated by a single species have significant intra-species genetic variation<sup>8</sup>, with  
46 multiple strains of the same species co-occurring. The factors contributing to the stability of  
47 different communities, and what causes transitions between the different CSTs, remain poorly  
48 understood<sup>9</sup>. Overall, it has become clear that community composition alone is insufficient to  
49 predict health outcomes, and resolving these questions requires understanding specific functions  
50 encoded by vaginal bacteria.

51 One function known to influence the composition and stability of host-associated microbial  
52 communities is the liberation of carbohydrates from specific dietary or host-derived sources by

53 glycoside hydrolases. This has been well established within the human gut microbiota,<sup>10</sup> where  
54 the presence of an extracellular glycoside hydrolase in *B. ovatus*, was beneficial for the success  
55 of the organism *in vivo*.<sup>11</sup> In addition, co-occurring bacteria have been shown to rely on a glycoside  
56 hydrolase ‘producer’ species for community access to carbon sources.<sup>11,12,13</sup> Compared to the  
57 gut, microbial carbohydrate metabolism in the vaginal environment is poorly understood. It is  
58 widely believed that glycogen secreted by vaginal epithelial cells supports the colonization of  
59 vaginal *Lactobacilli*<sup>14</sup>, since free glycogen levels in vaginal samples have been associated with  
60 *Lactobacillus* dominance and a low vaginal pH<sup>15</sup>. However, until recently, attempts to obtain  
61 vaginal *Lactobacillus* isolates that were capable of growth on glycogen were largely  
62 unsuccessful.<sup>16,17</sup> This difficulty raised the important question of how vaginal bacteria access this  
63 carbon source.

64 Glycogen consists of linear chains of  $\alpha(1-4)$  linked glucose moieties, with periodic  $\alpha(1-6)$   
65 branches. Metabolism of glycogen requires an extracellular glycoside hydrolase to release shorter  
66 glucose polymers (maltodextrins) for import into the cell. Several vaginal *Lactobacilli* have been  
67 shown to utilize maltodextrins for growth, leading to the initial hypothesis that a non-*Lactobacillus*  
68 glycoside hydrolase in the vaginal environment releases these oligosaccharides.<sup>18</sup> The detection  
69 of human  $\alpha$ -amylase via ELISA in cervicovaginal lavages (CVLs) by Spear et al. lent support to  
70 this proposal, and in the same study those authors went on to demonstrate that amylase-  
71 containing human saliva could support *L. crispatus* growth on glycogen.<sup>18</sup> How human amylase,  
72 which is produced predominantly in the pancreas and salivary glands,<sup>18</sup> comes to be found in  
73 genital fluid, has not yet been established. Further analysis of the CVLs in that study revealed  
74 that most samples had reduced amylase activity at low pH, consistent with the pH profile of human  
75 amylase.<sup>19</sup> In a small fraction of samples, though, activity increased as the pH became more  
76 acidic, suggesting the presence of other glycogen-degrading enzymes in the vaginal  
77 environment.<sup>19</sup>

78           In addition to human amylase, recent evidence suggests a potential role for bacterial  
79 enzymes in the breakdown of vaginal glycogen. The characterization of a small number of CVLs  
80 via proteomics and in-gel amylase assay after native polyacrylamide gel electrophoresis (PAGE)  
81 revealed the presence of several putative bacterial glycoside hydrolases, as well as the human  
82 enzyme.<sup>20</sup> In addition, Van der Veer and co-workers recently isolated several *L. crispatus* strains  
83 that could grow on glycogen. These authors suggested a putative secreted Type 1 pullulanase  
84 (PulA, WP\_003549917.1) as the source of amylase activity, based on strain-to-strain variation in  
85 its predicted signal peptide which correlates with growth on glycogen<sup>21</sup>. Type 1 pullulanases  
86 hydrolyze the  $\alpha(1-6)$  linkages in pullulan and other branched oligosaccharides, and this activity  
87 enables the release of maltodextrins from highly branched glycogen.<sup>22</sup> Homologs of PulA are  
88 present in a variety of vaginal genomes,<sup>9</sup> suggesting this enzyme might not be limited to  
89 *Lactobacillus* isolates, and highlighting the potential for competition for glycogen and/or cross-  
90 feeding. Notably, the proteomics study identified putative pullulanases from *Lactobacillus iners*  
91 and *Gardnerella vaginalis* in CVLs.<sup>20</sup> However, the predicted  $\alpha(1-6)$  specificity of Type I  
92 pullulanases raises questions regarding the fate of the remaining glycogen backbone and how  
93 longer branches are hydrolyzed. The identification of these bacterial enzymes also raises  
94 questions about the relative role of the human amylase in the vaginal ecosystem. However,  
95 interpretation of all of these results is confounded by the fact that none of the reported bacterial  
96 enzymes have been verified biochemically. A better understanding of glycogen metabolism within  
97 the vaginal microbiota would benefit from a detailed characterization of these enzymatic activities.

98           Here, we report the biochemical characterization of six signal peptide-containing PulA  
99 homologs from vaginal microbes representing *Lactobacillus*-dominated CSTs (I and III) and the  
100 diverse CST-IV community. We show that all of these proteins are glycogen-degrading enzymes  
101 (GDEs) that support growth of amylase-deficient *L. crispatus* on glycogen. We further characterize  
102 the substrate scope of each enzyme, finding that several should be reannotated as  
103 amylopullulanases. Using an enzymatic assay selective for pullulanases, an activity not exhibited

104 by human amylase, we provide evidence that these enzymes are present in CVLs. We also  
105 determine the pH optimum of each enzyme and the spectrum of oligosaccharide produced.  
106 Finally, we demonstrate selective inhibition of these enzymes, suggesting the possibility of  
107 therapeutic interventions for targeted vaginal microbial community modulation. Overall, this work  
108 provides mechanistic insight into the bacterial metabolism of an abundant carbon source in the  
109 vaginal microbiota.

## 110 **Results**

### 111 *Identification and purification of bacterial extracellular GDEs*

112 To identify candidate vaginal microbial GDEs, we conducted a BlastP search of genomes from  
113 151 vaginal isolates in the IMG database using the putative Type I pullulanase identified by Van  
114 der Veer et al in *L. crispatus* (PulA) as our query sequence<sup>21</sup> (WP\_003549917.1), with a cut-off  
115 of 35% amino acid identity. Hits were further narrowed to those containing a putative signal  
116 peptide, since glycogen degradation occurs extracellularly<sup>23</sup>. 69 potential homologs were  
117 identified across a range of bacteria (Supplementary File 1), including among others *Lactobacillus*  
118 *crispatus* (8/9 strains, average 99% amino acid identity), *Lactobacillus iners* (12/13 strains,  
119 average 46% identity), *Mobiluncus mulieris* (2/4 strains, average 43% identity), *Prevotella bivia*  
120 (2/2 strains, 40% identity), and *Gardnerella vaginalis* (15/18 strains, average 38% identity).  
121 Interestingly, gene neighborhood analysis revealed another signal peptide-containing glycoside  
122 hydrolase (GH 13) immediately next to the *P. bivia pulA* (25% identity to PulA), so this sequence  
123 was added to our analysis. Each of these bacteria has been previously associated with health or  
124 disease, thus subsequent efforts focused on this set of proteins. It should be noted that we also  
125 detected potential homologs with lower amino acid identity (Supplementary File 1), including one  
126 from *Streptococcus agalacticae* (SAG0089\_06185, 33% identity), and one significantly smaller  
127 protein in *Gardnerella vaginalis* (HMPREF0424\_1317) homologous to a recently reported  $\alpha$ -  
128 glucosidase enzyme from *Gardnerella spp.* that is active on maltose and other oligosaccharides,  
129 but lacks the ability to degrade glycogen.<sup>24</sup> PFAM domain analysis revealed that all six candidates

130 contain either an S-layer protein A domain (SlpA), a cell wall binding domain (CWB), or  
131 transmembrane helices (TM), suggesting they are located on the cell surface<sup>25,26,27</sup>. Additionally,  
132 each protein contains at least one  $\alpha$ -amylase catalytic domain (PF00128), which is a member of  
133 the glycoside hydrolase 13 enzyme family known to catalyze the cleavage of various glycosidic  
134 bonds<sup>28</sup>. Interestingly, the *G. vaginalis* enzyme contains two unique amylase domains. In addition,  
135 several of the proteins possess putative carbohydrate-binding domains, including the pullulanase  
136 domain (PUD; PF03714), which is common among bacterial pullulanase enzymes.<sup>29</sup> Additional  
137 carbohydrate binding modules from the CaZy database found in these enzymes include CBM25  
138 and CBM48, which are responsible for binding different linear and cyclic  $\alpha$ -glucans related to  
139 starch and glycogen<sup>28,30</sup> and for multivalent binding to soluble amylopectin and pullulan<sup>31</sup> (**Fig.**  
140 **1a**).

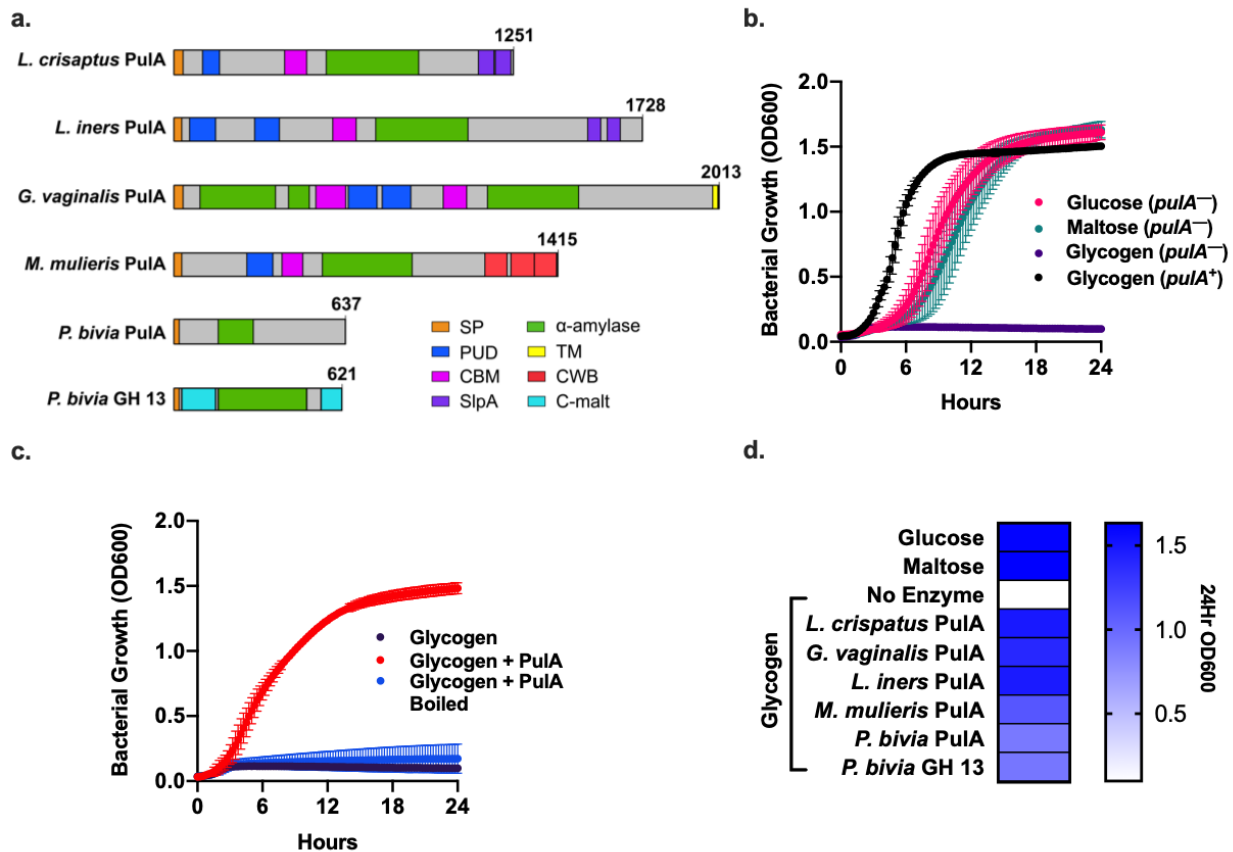

141 **Fig. 1: Purified glycogen-degrading enzymes support *L. crispatus* growth on glycogen.** a. Predicted domains in  
 142 putative vaginal microbial extracellular GDEs. Abbreviations: **SP**, Signal Peptide; **PUD**, Bacterial Pullulanase-  
 143 Associated Domain; **CBM**, Carbohydrate Binding Module 48(*L. crispatus*, *L. iners*, *G. vaginalis*, *M. mulieris*)  
 144 Carbohydrate Binding Module 21(*G. vaginalis*); **SlpA**, Surface Layer Protein A; α-Amylase, α-Amylase Catalytic  
 145 Domain; **C-Malt**, Cyclomaltodextrinase Domain; **CWB**, Cell Wall Binding Repeat 2; **TM**, Transmembrane Helices. **b.**  
 146 Growth of *L. crispatus* C0176A1 (*pulA*<sup>-</sup>, JAEDCG000000000) and MV-1A-US (*pulA*<sup>+</sup>) on different carbon sources. **c.**  
 147 *L. crispatus* C0176A1 (*pulA*<sup>-</sup>) grown on Oyster glycogen supplemented with 200 nM purified *L. crispatus* PulA. **d.** Heat  
 148 map of OD<sub>600</sub> values of *L. crispatus* C0176A1 (*pulA*<sup>-</sup>) supplemented with 200 to 400 nM purified protein after 24 h of  
 149 growth. All growth curves are representative of three biological replicates with 3 or 4 technical replicates each day.  
 150 Error bars represent one standard deviation above and below the mean of all data collected.

151  
 152 *Purified GDEs support the growth of L. crispatus on glycogen*

153 The domain analysis of these enzymes suggested they act on extracellular carbohydrate  
 154 polymers. To test this hypothesis, we heterologously expressed and purified each protein,

155 removing the signal peptides for better expression in *E. coli* (**SI Fig. 1, SI Fig. 2**). We then  
156 investigated each enzyme's ability to support growth of a strain of *L. crispatus* that lacks *pulA* in  
157 its genome and is unable grow on glycogen (**Fig. 1b; SI Fig. 3**). When purified *L. crispatus* PulA  
158 was added to the medium at the time of inoculation, growth on glycogen was recovered (**Fig. 1c;**  
159 **SI Fig. 3**). This provides direct evidence that PulA is necessary for *L. crispatus* growth on  
160 glycogen, as suggested in previous work.<sup>21</sup> We next expanded this analysis to include the other  
161 five purified extracellular glycoside hydrolases. Each enzyme supported the growth of *pulA*-  
162 deficient *L. crispatus* on glycogen (**Fig. 1d; SI Fig. 3**), although titers were slightly lower for both  
163 *P. bivia* enzymes, suggesting they are not as efficient at glycogen degradation. Combining the  
164 two *P. bivia* enzymes did not affect the overall growth rate (data not shown).

165

#### 166 *Kinetic characterization reveals different glycosidic linkage and substrate preferences*

167 Having demonstrated the glycogen degrading activity of these enzymes indirectly through  
168 growth complementation, we next performed kinetic characterization using a variety of glucose  
169 polymers in order to determine the specificity of each enzyme for the different glycosidic linkages  
170 in glycogen, and their substrate preference (**Table 1, SI Fig. 4**). In addition to glycogen, we tested  
171 amylose, which consists solely of  $\alpha(1-4)$  linkages, and pullulan, a polymer that consists of  
172 maltotriose units connected by  $\alpha(1-6)$  linkages. Consistent with the results of the growth  
173 supplementation experiment, all enzymes were active on glycogen. In addition, all were active on  
174 pullulan, suggesting the ability to cleave  $\alpha-1,6$  linkages, which was later confirmed by liquid  
175 chromatography-mass spectrometry (LC-MS) analysis of the products (discussed below).  
176 However, the enzymes differed in their activity toward the  $\alpha(1-4)$  linkages in amylose, with *L.*  
177 *crispatus*, *L. iners*, *G. vaginalis* and *P. bivia* GH13 enzymes showing activity while the *M. mulieris*  
178 PulA and *P. bivia* PulA were inactive (**Table 1, SI Fig. 4**).

179 In general, the measured kinetic parameters were consistent with prior values observed  
180 for bacterial enzymes that process these substrates (glycogen<sup>32,33,34</sup>, amylose<sup>35,36</sup>, pullulan<sup>37,35</sup>).



181 Comparing the specificity constants for each substrate revealed that glycogen is the preferred  
182 substrate for the *G. vaginalis* and *L. iners* PulA. The *L. crispatus* PulA had similar specificity  
183 constants for both pullulan and glycogen, with a lower specificity for amylose. Other enzymes,  
184 including *P. bivia* PulA and *M. mulieris* PulA, had higher specificity constants for pullulan in  
185 comparison to glycogen and amylose, while the *P. bivia* GH 13 enzyme preferred amylose (**Table**  
186 **1; SI Fig. 4**). Taken together, these data demonstrate that both *Lactobacillus* PulA enzymes, the  
187 *G. vaginalis* PulA enzyme, and the glycoside hydrolase from *P. bivia* can cleave  $\alpha$ -1,4 linkages  
188 and likely also  $\alpha$ -1,6 linkages needed for the complete utilization of glycogen, and support their  
189 reassignment as amylopullulanases (EC. 3.2. 1.1/41, reviewed in<sup>38</sup>). In contrast, the lack of  
190 activity of the *M. mulieris* and *P. bivia* PulA enzymes on amylose identifies them as strictly  
191 pullulanases and may explain their reduced ability to complement *L. crispatus* growth on glycogen  
192 (**Fig. 1d**).

| Enzyme                   | Substrate | $k_{cat}$ ( $s^{-1}$ ) | $K_m$ (mg $mL^{-1}$ ) | Specificity Constant ( $mL\ mg^{-1}\ s^{-1}$ ) | Classification   |
|--------------------------|-----------|------------------------|-----------------------|------------------------------------------------|------------------|
| <i>L. crispatus</i> PulA | Glycogen  | 65 ± 4                 | 0.091 ± 0.026         | 710 ± 210                                      | Amylopullulanase |
|                          | Amylose   | 33 ± 7                 | 0.25 ± 0.14           | 130 ± 80                                       |                  |
|                          | Pullulan  | 100 ± 10               | 0.15 ± 0.05           | 700 ± 250                                      |                  |
| <i>L. iners</i> PulA     | Glycogen  | 51 ± 5                 | 0.10 ± 0.05           | 500 ± 220                                      | Amylopullulanase |
|                          | Amylose   | 30 ± 4                 | 0.20 ± 0.07           | 150 ± 60                                       |                  |
|                          | Pullulan  | 27 ± 9                 | 0.93 ± 0.56           | 29 ± 20                                        |                  |
| <i>G. vaginalis</i> PulA | Glycogen  | 450 ± 40               | 0.098 ± 0.044         | 4600 ± 2100                                    | Amylopullulanase |
|                          | Amylose   | 110 ± 10               | 0.27 ± 0.06           | 390 ± 90                                       |                  |
|                          | Pullulan  | 220 ± 40               | 0.42 ± 0.170          | 520 ± 230                                      |                  |
| <i>M. mulieris</i> PulA  | Glycogen  | 57 ± 9                 | 6.1 ± 1.7             | 9.5 ± 3.0                                      | Pullulanase      |
|                          | Amylose   | NA                     | NA                    | NA                                             |                  |
|                          | Pullulan  | 150 ± 20               | 0.33 ± 0.14           | 440 ± 200                                      |                  |
| <i>P. bivia</i> PulA     | Glycogen  | 0.81 ± 0.31            | 11 ± 7                | 0.077 ± 0.058                                  | Pullulanase      |
|                          | Amylose   | NA                     | NA                    | NA                                             |                  |
|                          | Pullulan  | 60 ± 6                 | 0.24 ± 0.07           | 250 ± 70                                       |                  |
| <i>P. bivia</i> GH13     | Glycogen  | 5.1 ± 0.60             | 3.8 ± 1.0             | 1.4 ± 0.3                                      | Amylopullulanase |
|                          | Amylose   | 210 ± 50               | 0.68 ± 0.33           | 310 ± 160                                      |                  |
|                          | Pullulan  | 120 ± 30               | 1.5 ± 0.6             | 79 ± 38                                        |                  |

193 **Table 1: Kinetic analysis of vaginal microbial glycogen-degrading enzymes on various carbohydrate polymers**  
 194 **at pH 5.5.** Values are representative of three experimental replicates over two days. Error range represents one  
 195 standard deviation above and below the mean.

196  
 197 *Site-directed mutagenesis of G. vaginalis PulA confirms the contribution of both active sites to*  
 198 *enzyme activity*

199 *G. vaginalis* PulA contains two  $\alpha$ -amylase catalytic domains, suggesting there may be two  
 200 functional active sites. To probe the activity of each domain individually, active site mutants of  
 201 each catalytic domain as well as a double active site mutant were constructed by mutating the  
 202 critical catalytic aspartate residue to alanine (**SI Fig. 5**). The specific activities of the single active  
 203 site mutants were significantly reduced, retaining approximately 5% of wild-type activity, and the

204 double mutant was completely inactive (**SI Fig. 5**). This result confirms the individual activity of  
205 each active site and suggests they may act synergistically to process glycogen.

206

207 *The Lactobacillus GDEs maintain activity at low pH*

208 *Lactobacillus*-dominant communities are typically associated with a lower vaginal pH than  
209 mixed anaerobic communities due to their high production of lactic acid, which excludes other  
210 microbes<sup>15</sup>. We therefore hypothesized that GDEs from *Lactobacilli* may have evolved to maintain  
211 activity at a lower pH than those from other vaginal bacteria. Measuring specific activity on  
212 glycogen, we screened a pH range from 2.5 to 8.0 (**Fig. 2**). Five of the GDEs have a pH optimum  
213 between 5.5 and 6.0, which is consistent with values observed for other characterized bacterial  
214 pullulanases and amylopullulanases.<sup>39</sup> *P. bivia* PulA had a slightly lower pH optimum of between  
215 4.5 and 5 (**Fig. 2**). We observed that most of the enzymes from vaginal anaerobes – *G. vaginalis*  
216 PulA, *M. mulieris* PulA, and *P. bivia* GH 13 – have almost no activity at pH 4.0, which is within the  
217 range of a healthy vaginal community.<sup>40</sup> Critically, however, the *Lactobacillus crispatus*,  
218 *Lactobacillus iners* and *Prevotella bivia* PulAs retain 45%, 62% and 71% of their maximal activity  
219 at pH 4.0, suggesting these enzymes are better suited for a low pH environment. The ability to  
220 compete effectively for host-derived glycogen at low pH may potentially contribute to the stability  
221 of *Lactobacillus*-dominant communities.

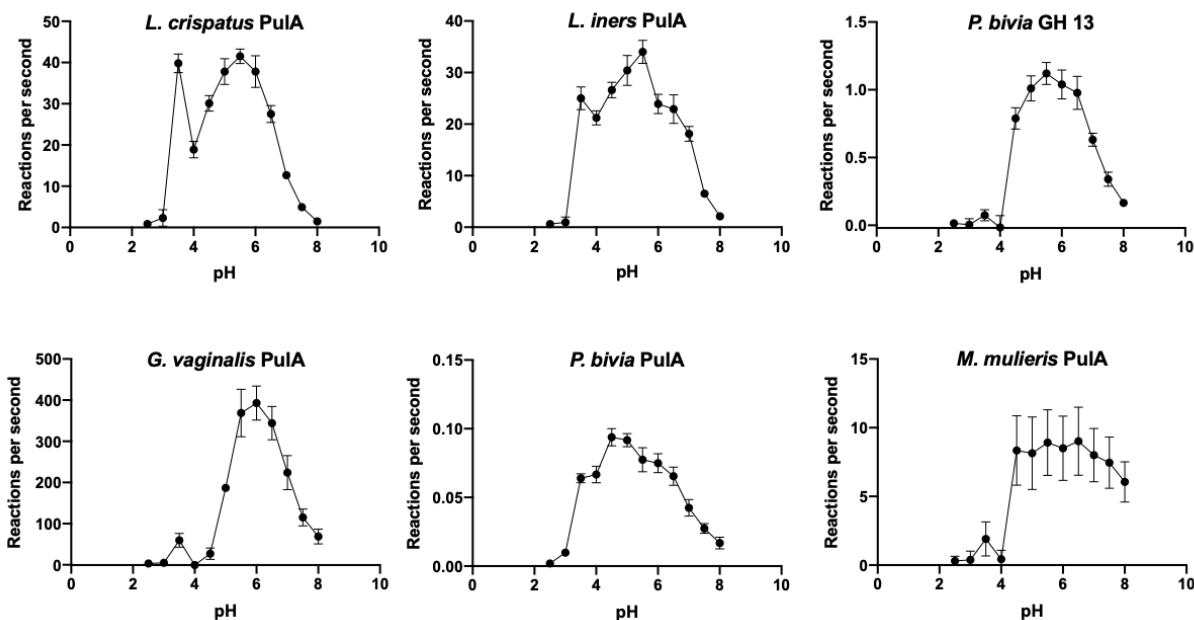

222 **Fig. 2: *Lactobacillus* amylopullulanases are adapted to a low pH environment** pH profiles of six extracellular  
223 glycogen-degrading enzymes. Buffer systems consisted of glycine (pH = 2.5 to 3.5), sodium acetate (pH = 4.0 to 5.0),  
224 MES (pH = 5.5 to 6.5), HEPES (pH = 7.0 to 8.0). Data is representative of three experimental replicates over two days.  
225 Error bars represent one standard deviation above and below the mean.

226

### 227 *Breakdown product analysis reveals distinct oligosaccharide product production by GDEs*

228 Next, we sought to characterize the oligosaccharides produced by each enzyme.  
229 Following overnight incubations with glycogen, amylose, and pullulan, oligosaccharide production  
230 was quantified by LC-MS (**Fig. 3**). Both human amylase and the *P. bivia* GH 13 produced  
231 predominantly maltose and a relatively small amount of glucose from glycogen and amylose. In  
232 contrast, the enzymes annotated as Type I Pullulanases (PulA homologs) produced longer  
233 oligosaccharides in addition to maltose, including maltotriose and in some cases maltotetraose.  
234 These results are similar to those observed for previously characterized bacterial  
235 amylopullulanases<sup>41,38</sup>. Amongst the pullulanases, maltotetraose was not detected in the *G.*  
236 *vaginalis* PulA reaction, and was only detected at a low level in *M. mulieris* and *P. bivia*. However,  
237 the *Lactobacillus*-derived PulA enzymes produced a higher relative amount of maltotetraose when  
238 acting on amylose or glycogen. During incubation with pullulan, all of the bacterial enzymes

239 produced predominantly maltotriose, however the human salivary amylase was not active on this  
 240 substrate. The sole production of maltotriose is common among enzymes that degrade  
 241 pullulan<sup>37,39,41</sup> and provides direct confirmation that vaginal bacterial GDEs can cleave  $\alpha$ -1,6  
 242 linkages. This observation further corroborates the functional assignments of these enzymes as  
 243 either amylopullulanases or pullulanases (**Table 1**).

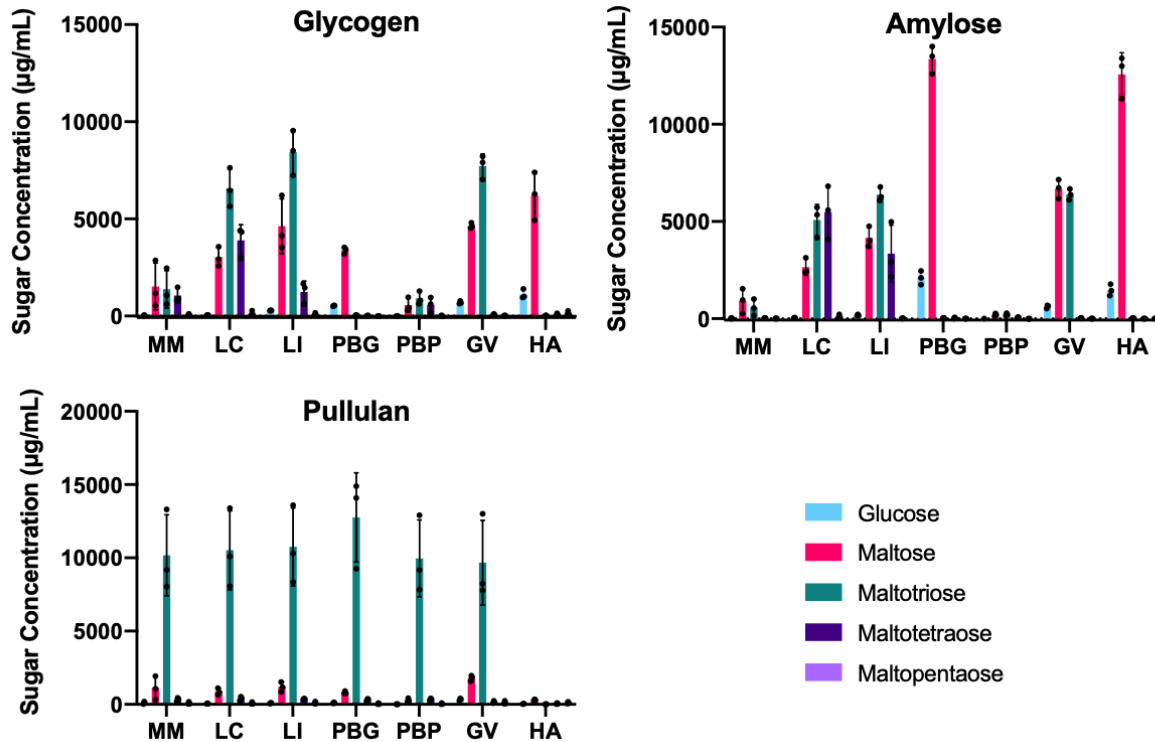

244 **Fig. 3: *Lactobacillus crispatus* amylopullulanase produces unique breakdown products** a. Polymer breakdown  
 245 products generated following overnight incubation with purified enzyme. LC-MS analysis is representative of three  
 246 experimental replicates over three days. Error bars represent one standard deviation above and below the mean.  
 247 Protein abbreviations are as follows, **MM**, *M. mulieris* PulA; **LC**, *L. crispatus* PulA; **LI**, *L. iners* PulA; **PBG**, *P. bivia*  
 248 GH13, **PBP**, *P. bivia* PulA; **GV**, *G. vaginalis* PulA; **HA**, Human Amylase

249

250 *Acarbose selectively inhibits GDEs from G. vaginalis and P. bivia*

251 Given the clear biochemical differences revealed in the pH optimum and breakdown product

252 analysis of the bacterial GDEs, and their role in enabling growth on glycogen, we hypothesized

253 that these enzymes may be good targets for possible therapeutic intervention aimed at

254 establishing a *Lactobacillus*-dominant community. We therefore turned our focus to identifying  
255 inhibitors for the GDEs from microbes associated with dysbiosis and screened each purified  
256 enzyme against a panel of four clinically relevant human amylase inhibitors. Of the compounds  
257 tested, only acarbose and acarviosin showed any inhibition (**Fig. 4a**). We then determined IC<sub>50</sub>  
258 values for the inhibition of each enzyme by acarbose, the most promising inhibitor. Acarbose  
259 inhibited *G. vaginalis* PulA, *P. bivia* PulA, and *P. bivia* GH 13 enzymes with IC<sub>50</sub> values of 120 ±  
260 30 μM, 420 ± 90 μM, and 0.84 ± 0.05 μM, respectively, while the *L. crispatus*, *L. iners*, and *M.*  
261 *mulieris* enzymes were largely unaffected (**Fig. 4b**). For comparison, the IC<sub>50</sub> of acarbose  
262 towards human amylase is approximately 11 μM.<sup>42</sup>

263         Since acarbose selectively inhibited GDEs from CST-IV-associated microbes, as a first  
264 step toward community modulation, we characterized its effect on the growth of several vaginal  
265 microbes. While acarbose inhibited *G. vaginalis* growth on glycogen (IC<sub>50</sub> = 0.2 μM), it also  
266 inhibited *L. crispatus* growth on maltose (IC<sub>50</sub> = 22 μM) and glycogen (IC<sub>50</sub> = 0.1 μM), despite the  
267 fact that the *L. crispatus* PulA was not affected *in vitro*. Interestingly, growth was not affected  
268 when glucose was the primary carbon source (**Fig. 4c**). These data suggest there are additional  
269 *L. crispatus* enzymes involved in maltodextrin metabolism that are inhibited by acarbose. Despite  
270 potentially inhibiting the *P. bivia* GH13 *in vitro*, acarbose had no impact on *P. bivia* growth on any  
271 substrate. (**Fig 4c**). This suggests that PulA, which was less inhibited *in vitro*, is the predominant  
272 source of extracellular amylase activity, and that, unlike in *L. crispatus*, intracellular maltodextrin  
273 catabolism in *P. bivia* is not affected by acarbose. Overall, although acarbose is not a suitable  
274 candidate for community modulation due to its broad target spectrum, these results highlight  
275 differences between the glycogen-degrading enzymes that may be targeted for selective  
276 inhibition.

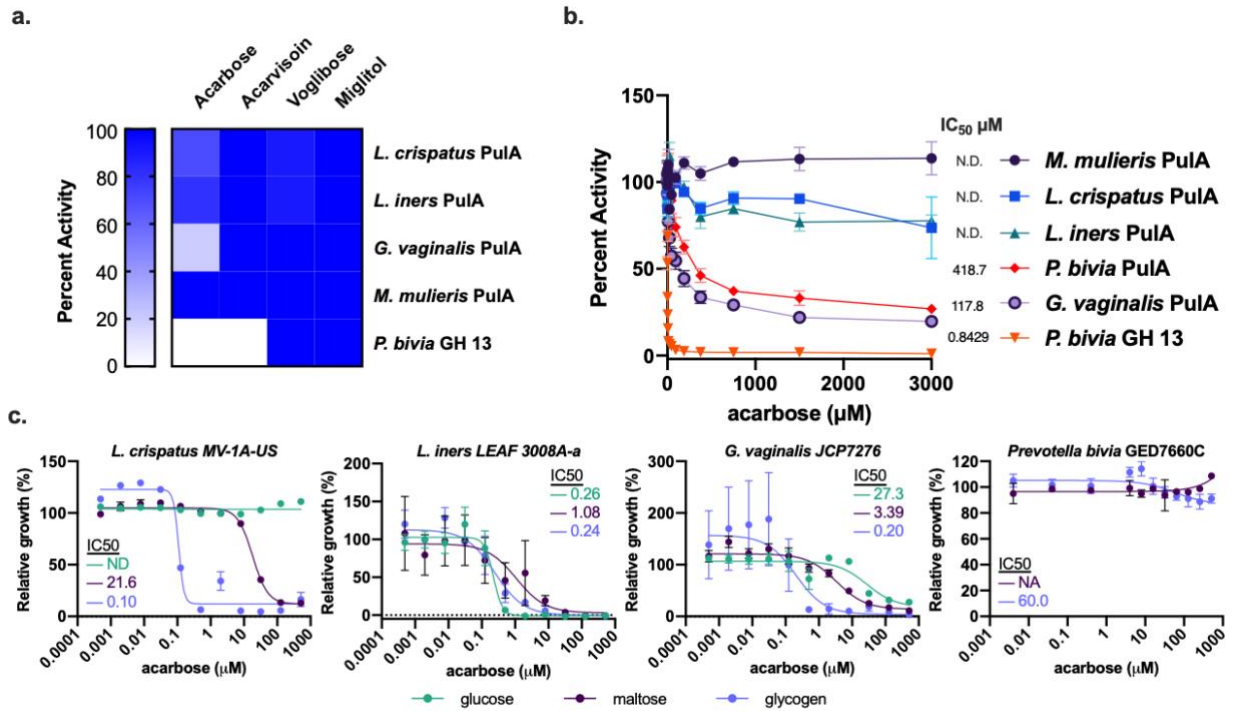

277 **Fig. 4: Selective inhibition of vaginal microbial GDEs** **a.** Effects of known amylase inhibitors (1 mM) on the activities  
 278 of purified GDEs toward a BODIPY fluorescent starch substrate. **b.** Inhibitory activity of acarbose toward purified  
 279 extracellular amylases. A BODIPY fluorescent starch substrate was used and activity was normalized to a no inhibitor  
 280 control. Data are representative of three experimental replicates over two days. Error bars represent one standard  
 281 deviation above and below the mean of the three trials. **c.** Bacteria were grown in the presence of the indicated  
 282 concentrations of acarbose in media containing either glucose, maltose or glycogen as the primary carbohydrate  
 283 source. Growth in the presence of inhibitor was normalized to the untreated control. IC<sub>50</sub> values were calculated using  
 284 a least-squares regression of the normalized values. ND (Not determined) is indicated when the resulting curve fit was  
 285 poor and an IC<sub>50</sub> value could not be confidently determined. Data are representative of at least two biological replicates  
 286 over two days and error bars are one standard deviation above and below the mean.

287

#### 288 Analysis of CVLs shows activity of human and microbial enzymes

289 Having identified *bona fide* amylopullulanases in vaginal microbial genomes, we next  
 290 sought to understand i) if they are expressed in the vaginal environment and ii) the relative  
 291 contribution of these enzymes compared to the human amylase found in previous work. To do  
 292 this, we analyzed 21 human cervicovaginal lavage (CVL) sample supernatants and pellets  
 293 spanning a range of Nugent scores. First, we compared total amylase activity in the samples to

294 the concentration of human amylase, as determined via ELISA. Across a range of pHs, there was  
295 a strong correlation between these measurements ( $R^2$  values; pH 4.4 = 0.832; pH 5.5 = 0.956;  
296 pH 6.8 = 0.985) (**Fig. 5a**), suggesting that the majority of the amylase activity in these samples is  
297 of human origin. To rule out the possibility that the ELISA signal arose from cross-reactivity of the  
298 antibodies with conserved structural features of one or more of the microbial enzymes identified  
299 here, we assayed our purified enzymes using the same kit, and found no cross-reactivity at  
300 enzyme concentrations as high as 1  $\mu\text{M}$  (**SI Fig. 6**). Though we cannot rule out the possibility that  
301 the antibodies react with additional microbial amylases not identified here, these data strongly  
302 corroborate previous findings of human amylase in vaginal samples and suggest that the  
303 contribution of this host enzyme in shaping the vaginal microbiome should not be overlooked,  
304 despite the existence of microbial enzymes with related activities.

305 We next attempted to determine if any of the microbial GDEs were present by assaying  
306 for activity using pullulan as a substrate, taking advantage of the fact that all the enzymes we  
307 examined were active on pullulan, whereas the human amylase was not (**Fig. 3**). Due to limited  
308 availability of sample material, our analysis was constrained to a small number of CVLs with high  
309 amylase activity (**Fig. 5a**). In one out of the four samples assayed (sample 2171), there was  
310 significant enzymatic production of maltotriose from pullulan (**Fig. 5b, SI Fig. 7**). Notably, in this  
311 sample significant amylase activity was retained even at low pH, which is inconsistent with the pH  
312 profile of the human enzyme. The majority of the pullulanase activity was present in the pellet,  
313 consistent with the predicted cell wall localization of the bacterial GDEs. Additionally, in these  
314 samples the activity of the supernatant on glycogen was similar to the activity of the pellet on  
315 pullulan, suggesting that microbial enzyme(s) constitutes a significant fraction of the total activity.  
316 These results demonstrate that vaginal microbial amylopullulanase enzymes contribute to  
317 carbohydrate breakdown activity in patient samples, and highlight a need to include both  
318 supernatants and microbial pellets in future assays with clinical samples so as not to disregard  
319 bacterial cell wall-associated activity.



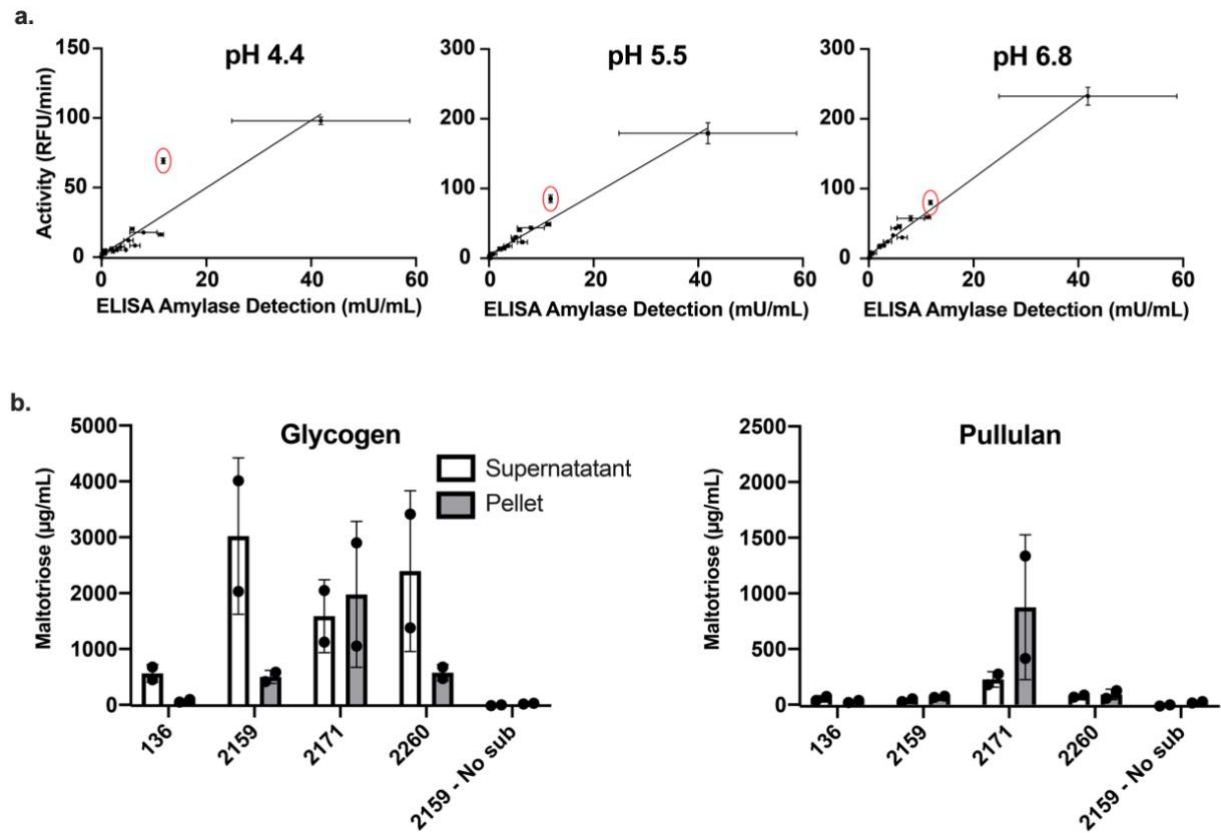

320 **Fig. 5: Human CVLs samples contain human and microbial amylase activity** **a.** Activity of human CVL  
321 supernatants correlated with human amylase detection by ELISA at all pH levels. Red circled point denotes sample  
322 2171. Activity was determined using three experimental replicates over two days for each sample. Error bars are  
323 representative of one standard deviation above and below the mean. **c.** Four most active human CVL samples  
324 degrading carbohydrate polymers into maltotriose detected by LC-MS analysis. Data are representative of two  
325 experimental replicates over two days and the error bars are one standard deviation above and below the mean.

326

## 327 Discussion

328 In this study, we characterized six glycogen-degrading enzymes from vaginal bacterial  
329 isolates. Our results demonstrate that, in addition to relying on human amylase, some vaginal  
330 bacteria possess alternative enzymes for accessing glycogen. A critical finding of this work is that,  
331 despite sharing a common annotation, the substrate preferences of the different PulAs are quite  
332 distinct. While the *L. crispatus*, *L. iners* and *G. vaginalis* amylopullulanases had the highest  
333 specificity for glycogen, enzymes from other organisms were most active on amylose or pullulan

334 and had comparatively high  $K_m$  values for glycogen. This is consistent with the unique  
335 carbohydrate binding modules in each protein and may suggest adaptation to structurally distinct  
336 glucose polymers in the vaginal environment. Further, since the oligosaccharides produced from  
337 glycogen breakdown are released extracellularly and may act as ‘public goods’<sup>43</sup>, the differences  
338 in the product distribution of these enzymes may suggest differential availability of  
339 oligosaccharides between community state types, supporting the growth of distinct non-glycogen-  
340 degrading bacteria via cross-feeding, as has been shown within the gut microbiota<sup>13</sup>. A better  
341 understanding of the structure of glycogen within the vaginal environment, and whether it is  
342 different among CSTs, is needed to further evaluate this possibility.

343 Our work also suggests a potential mechanism for *L. crispatus* dominance in a low pH  
344 environment. The higher relative activity of the *L. crispatus* amylopullulanase at the healthy  
345 vaginal pH (~3.5-4) may provide an advantage in accessing glycogen, facilitating exclusion of  
346 bacteria with GDEs which are less active under these conditions, and/or bacteria relying on  
347 glycogen breakdown products released by human amylase, which is also minimally active in this  
348 pH range. Critically, the pH optimum of amylases cannot be predicted from primary sequence  
349 analysis<sup>44</sup>, further highlighting the need for biochemical characterization to support bioinformatic  
350 interrogations of microbial function within communities.

351 Though our work shows that *Lactobacillus crispatus* encodes an enzyme that allows  
352 growth on glycogen, interesting questions remain about how other common vaginal *Lactobacilli*  
353 lacking a *pulA* homolog can dominate a community, for example *Lactobacillus jensenii* (CST V)  
354 and *Lactobacillus gasseri* (CST II). Possibly these microbes rely on cross-feeding of  
355 oligosaccharides produced by human amylase or GDEs from other vaginal microbes, since they  
356 are capable of growth on a range of maltooligosaccharides<sup>18</sup>.

357 Our efforts to identify inhibitors for bacterial GDEs demonstrate that these enzymes have  
358 sufficient biochemical diversity to be selectively targeted. Unfortunately, growth assays in  
359 bacterial cultures suggest these existing amylase inhibitors have additional effects on

360 maltodextrin metabolism that limit our ability to target specific bacteria. Future work could examine  
361 other differences in maltooligosaccharide catabolism between vaginal strains, and phenotypic  
362 screening approaches may help identify inhibitors that favor the growth of *Lactobacillus* strains  
363 through the collective inhibition of amylases from both bacteria associated with dysbiosis, and the  
364 host.

365 Finally, our characterization of patient CVLs demonstrated that microbial GDEs are not  
366 only found in vaginal microbial genomes, but are likely also expressed and active in their native  
367 environment. Understanding the relative contribution of human and microbial enzymes to  
368 glycogen catabolism may provide insight into microbial community dynamics. Our results, and  
369 those from other efforts (Forney, Spear)<sup>20,18</sup> show that the presence of bacterial glycoside  
370 hydrolases in patient samples is highly variable, thus this line of investigation would benefit from  
371 testing larger numbers of clinical samples. Yet current methods for analyzing the specific  
372 contribution from microbial enzymes rely either on metaproteomics or zymography,<sup>20</sup> which are  
373 not widely accessible in clinical labs. Here we showed that a simple biochemical pullulanase  
374 assay can be used to identify microbial-specific activity in clinical samples, and we anticipate this  
375 methodology will find broad utility in the analysis of patient samples to gain further insight into  
376 potential roles of bacterial GDEs in community stability. Overall, the ecologically relevant insight  
377 gained from this investigation highlights the need for complementing bioinformatic analysis with  
378 detailed biochemical enzyme characterization.

379

### 380 **Acknowledgements**

381 We thank Amelia Woo and Paula Pelayo for help cloning several of the bacterial Pula homologs,  
382 as well as Beverly Fu for critical reading of the manuscript. We are grateful to Dr. Caroline Mitchell  
383 and Agnes Bergerat-Thompson at Massachusetts General Hospital for providing CVL samples.  
384 Financial support for this study was provided by the Bill & Melinda Gates Foundation under award  
385 No. OPP1189211. M. Indriati Hood Pishchany was supported as a Fellow in the Pediatric Scientist

386 Development Program, Award Number HD000850 from the Eunice Kennedy Shriver National  
387 Institute of Child Health and Human Development. S. R.-N. is supported by a Career Award for  
388 Medical Scientists from the Burroughs Wellcome Fund, a Pew Biomedical Scholarship, a Basil  
389 O'Connor Starter Scholar Award from the March of Dimes, 1K08AI130392-01, and by the  
390 NIGMS/NIH under award DP2GM136652

391

### 392 **Author Contributions**

393 EPB and BMW conceived the study. BMW and DJJ designed and conducted enzyme purification  
394 and biochemical characterization experiments. BMW, DJJ, and EPB wrote the manuscript. DJJ  
395 and MIH designed and conducted bacterial growth experiments. All authors contributed to the  
396 interpretation of data, were involved in the revision of the manuscript, and approved the final  
397 manuscript. BMW and DJJ contributed equally to the study.

398

### 399 **Competing Interests**

400 The authors declare no competing interests

401

### 402 **Methods**

#### 403 *Reagents*

404 Unless otherwise noted, commercial chemicals were of the highest purity available and purchased  
405 from Sigma-Aldrich. Acetonitrile for LC-MS was purchased from Honeywell-Burdick & Jackson.

406

#### 407 *Identification and cloning of glycogen degrading enzymes*

408 Homologs of Pula in *L. crispatus*<sup>21</sup> (EEU28204.2) were identified by BlastP search of genomes  
409 from vaginal isolates in the IMG database<sup>45</sup> using an E-value cut-off of  $1 \times 10^{-5}$ . Hits were further  
410 curated by removing proteins with no predicted signal peptide (SignalP v5.0<sup>46</sup>). A panel of six  
411 candidates with >35% amino acid identity from microbes associated with health or disease were

412 selected for further study. The strains were obtained and genomic DNA was extracted with a  
413 DNeasy UltraClean Microbial Kit (Qiagen). Genes were amplified via PCR with primers designed  
414 to remove the signal peptide (**SI Fig. 2**) and cloned into the *E. coli* expression vector pET28a  
415 (Novagen) via Gibson assembly (New England Biolabs, NEB) to generate an N-terminal His<sub>6</sub>-  
416 tagged gene. All plasmids were verified via Sanger sequencing (Eton Biosciences) and  
417 transformed into the expression host BL21 (DE3) (*P. bivia* enzymes) or ArcticExpress (DE3) (all  
418 other enzymes) for expression and purification. Complete lists of plasmids and primers are  
419 provided in Supplementary Tables 1 and 2, respectively.

420

#### 421 *Purification of glycogen degrading enzymes*

422 Cultures containing expression plasmids were grown in 2-6 L of LB (Research Products  
423 International, RPI) containing 50 µg/mL kanamycin. Once cultures reached an optical density at  
424 600 nm (OD<sub>600</sub>) of 0.6-0.8, they were cooled to 15 °C and induced with 250 µM IPTG (Teknova).  
425 After 16 h at 15 °C, cells were harvested (6720 x g for 10 min at 4 °C) and the pellets were stored  
426 at -20 °C until use. Pellets were resuspended in 98% Buffer A (50 mM HEPES, 300 mM KCl,  
427 10% glycerol, pH 7.8), 2% Buffer B (50 mM HEPES, 300 mM KCl, 10% glycerol, 500 mM  
428 imidazole, pH 7.8) supplemented with EDTA-free protease inhibitor cocktail (Sigma). Cells were  
429 lysed via homogenization (3 x 15,000 psi, Emulsiflex-C3, Avestin) and lysates were clarified  
430 (16,000 x g for 45 min at 4 °C) before being loaded onto a 5 mL HisTrap column (GE Healthcare).  
431 This was followed by one column volume (c.v.) of 2% Buffer B, and 2 c.v. of 10% Buffer B. Protein  
432 was eluted using a linear gradient from 10 to 100% Buffer B over 20 c.v., and protein-containing  
433 fractions and purity was determined by SDS-PAGE (Biorad) The following day, protein-containing  
434 fractions were pooled, concentrated to a volume of approximately 1 mL in a spin concentrator  
435 (Millipore), and purified by size exclusion chromatography (GE Healthcare, Superdex 200) in  
436 100% buffer A. Fractions were again analyzed by SDS-PAGE and protein-containing fractions  
437 were pooled, concentrated (Millipore, Amicon 30 kDa), flash frozen in liquid nitrogen, and stored

438 at  $-80\text{ }^{\circ}\text{C}$  until use. Protein concentration was determined using a Bradford assay (BioRad).  
439 Molecular weights used for concentration determination was done using the native protein  
440 sequences predicted in EXPASY.

441  
442 *L. crispatus* purified protein growth recovery assay  
443 MRS broth containing glucose (BD Difco) was prepared according to the manufacturer's protocol.  
444 For growth assays on different carbon sources, MRS broth without glucose (Food Check  
445 Systems) was prepared according to the manufacturer's recipe and supplemented with either 2%  
446 D-glucose (Sigma), 2% maltose monohydrate (VWR), or 5% glycogen from oyster (Sigma). Each  
447 media type was filter sterilized ( $0.2\text{ }\mu\text{m}$ ) and left inside an anaerobic chamber with an atmosphere  
448 of 2.5%  $\text{H}_2$ , 5%  $\text{CO}_2$ , 92.5%  $\text{N}_2$  (Coy Labs) overnight for equilibration. Starter cultures of *L.*  
449 *crispatus* C0176A1 (*pulA*<sup>-</sup>) and *L. crispatus* MV-1A-US (*pulA*<sup>+</sup>) were inoculated into MRS media  
450 (BD Difco) in Hungate tubes (VWR) and incubated overnight at  $37\text{ }^{\circ}\text{C}$ . The next day, purified  
451 protein was thawed and added to 5% glycogen MRS media to a concentration ranging between  
452 200-400 nM. After protein addition, the media was again filter sterilized before use. As a negative  
453 control, protein boiled at  $100\text{ }^{\circ}\text{C}$  for 15 min was also used in the assay. Immediately after protein  
454 addition, 50  $\mu\text{L}$  of each media type was aliquoted into a 384-well TC-treated, clear microplate  
455 (Corning). 1  $\mu\text{L}$  of overnight culture was used to inoculate each well. The plate was sealed (VWR),  
456 and growth was monitored in a plate reader (Biotek) inside of an anaerobic chamber (Coy Labs)  
457 for 24 h by measuring  $\text{OD}_{600}$  every 15 min while incubating at  $37\text{ }^{\circ}\text{C}$ . Growth conditions contained  
458 2.5%  $\text{H}_2$ , 97.5%  $\text{N}_2$  with oxygen levels maintained below 20 ppm. Three experimental replicates  
459 over three days were performed with three to four technical replicates on each day.

460  
461 *Kinetic analysis of glycogen-degrading enzymes*

462 Kinetic analysis of glycogen-degrading enzymes was performed using a previously described  
463 reducing sugar assay,<sup>37</sup> modified for a 96-well format. 300  $\mu\text{L}$  reactions were set up containing

464 substrate (0.0048-10 mg mL<sup>-1</sup> glycogen; 0.0012-1.25 mg mL<sup>-1</sup> Pullulan (Megazyme); or 0.0048-  
465 1.25 mg mL<sup>-1</sup> amylose in a final concentration of 2% DMSO), 0.8-700 nM enzyme, and reaction  
466 buffer (20 mM sodium acetate, pH 5.5, 0.5 mM CaCl<sub>2</sub>). Reactions were incubated at 37 °C for 15  
467 min and 50 µl aliquots were removed (2, 5, 7.5, 10, 15 min) into 125 µL of the BCA stop solution  
468 (0.4 M sodium carbonate, pH 10.7, 2.5 mM CuSO<sub>2</sub>, 2.5 mM 4,4'-dicarboxy-1,2'-biquinoline, 6 mM  
469 L-serine). After 30 min incubation at 80 °C, 125 µL was transferred to a TC-treated flat bottom  
470 plate (Greiner Bio) and absorbances were read at 540 nm. A maltose standard curve (0.000610-  
471 0.625 mg mL<sup>-1</sup>) was used to quantify hydrolysis activity. Initial velocities were calculated via linear  
472 regression selecting the data points that produced the highest initial rate utilizing at least three  
473 data points.  $K_M$  and  $k_{cat}$  parameters were determined by fitting the Michaelis-Menten equation to  
474 the initial velocity data using nonlinear regression (Graphpad Prism 8). Replicates consisted of  
475 three experimental trials over two days.

476

#### 477 *Enzyme pH profile and G. vaginalis Pula active site mutant activity on Glycogen*

478 The reducing sugar assay described above was used to determine the dependence of activity on  
479 pH. Reactions contained 1.25 mg mL<sup>-1</sup> glycogen, 0.9 to 1050 nM enzyme, and assay buffer  
480 ranging in pH from 2.5 to 8.0 (20 mM glycine, 0.5 mM CaCl<sub>2</sub>, pH 2.5-3.5; 20 mM sodium acetate,  
481 0.5 mM CaCl<sub>2</sub>, pH 4.0-5.0; 20 mM MES, 0.5 mM CaCl<sub>2</sub>, pH 5.5-6.5; 20 mM HEPES, 0.5 mM  
482 CaCl<sub>2</sub>, pH 7.0-8.0). Initial velocities were determined for each condition and normalized to enzyme  
483 concentration. A maltose standard curve (0.000610-0.625 mg mL<sup>-1</sup>) was used to quantify  
484 hydrolysis. Replicates consisted of three experimental replicates over two days. Specific activity  
485 *G. vaginalis* Pula active site mutants were performed as described above at pH 5.5.

486

#### 487 *Polysaccharide breakdown product analysis and growth studies*

488 To measure polysaccharide breakdown products, reactions were set up containing 10 mg mL<sup>-1</sup>  
489 substrate and 500 nM enzyme, all dissolved in assay buffer (20 mM sodium acetate, 0.5 mM

490 CaCl<sub>2</sub>, pH 5.5) and incubated at 37 °C overnight. The next day, samples were quenched with a  
491 10-fold dilution into 90% LC-MS grade acetonitrile. The plates were centrifuged (3220 x g for 10  
492 min, 4 °C) and the samples were diluted 1000-fold into LC-MS grade acetonitrile before analysis  
493 by LC-MS. An ultra-high performance liquid chromatography tandem mass spectrometry  
494 (UHPLC-MS/MS) system model Xevo TQ-S (Waters) was used in this study. The mass  
495 spectrometer system consists of a triple quadrupole equipped with an electrospray ionization  
496 probe (ESI). 5 µL of sample was injected onto an Acquity BEH/Amide UPLC Column heated to  
497 40 °C (Waters, 1.7 µm, 130Å, 2.1 mm x 50 mm). A flow rate of 0.5 ml min<sup>-1</sup> was used. The following  
498 gradient was applied: 0-1.0 min at 97 % B (acetonitrile with 0.1% formic acid) and 3% A (H<sub>2</sub>O with  
499 0.1% formic acid) isocratic, 1.0-4.0 min 97-30% B, 4.0-5.0 min at 30% B isocratic, 5.0-5.1 min at  
500 30-97% B, 5.1-7.0 min at 97% B isocratic. Carbohydrate products were detected by ESI in positive  
501 mode (capillary voltage 3.10 kV; cone voltage 42 V; source offset voltage 50 V; desolvation  
502 temperature 500 °C; desolvation gas flow 1000 L/hr; cone gas flow 150 L/hr; nebuliser 7.0 bar).  
503 See supplementary information for compound specific detection parameters (**SI table 3**). For  
504 quantification, standards of glucose, maltose (VWR), maltotriose (Carbsynth), maltotetraose  
505 (Carbsynth), and maltopentaose (Carbsynth) were prepared ranging from 0.001-10 µg mL<sup>-1</sup> in 9:1  
506 acetonitrile:water. Oligosaccharide peak areas were quantified using the standard curve. These  
507 data consisted of three experimental replicates run over three different days.

508

#### 509 *Inhibitor growth assays*

510 Inhibition growth assays were performed in an anaerobic chamber (Coy Labs) with an atmosphere  
511 of 2.5 % H<sub>2</sub>, 5 % CO<sub>2</sub>, 92.5 % N<sub>2</sub>. Bacteria were inoculated from single colonies into a peptone-  
512 yeast extract base broth (PYTs) consisting of proteose peptone (20 g L<sup>-1</sup>), yeast extract (10 g L<sup>-1</sup>)  
513 <sup>1</sup>), MgSO<sub>4</sub> (0.008 g L<sup>-1</sup>), K<sub>2</sub>HPO<sub>4</sub> (0.04 g L<sup>-1</sup>), KH<sub>2</sub>PO<sub>4</sub> (0.04 g L<sup>-1</sup>), NaHCO<sub>3</sub> (0.4 g L<sup>-1</sup>), vitamin K  
514 (0.0025 g L<sup>-1</sup>), hemin (0.005 g L<sup>-1</sup>), L-cysteine • HCl (0.25 g L<sup>-1</sup>), Tween 80 (0.25 mL L<sup>-1</sup>), horse  
515 serum (50 mL L<sup>-1</sup>), and glucose (2 g L<sup>-1</sup>), and incubated at 37 °C for approximately 24 h. Cultures



516 were adjusted to OD<sub>600</sub> 0.4-0.5 , sub-cultured at a 1:50 dilution into fresh PYTs (without glucose)  
517 with the indicated carbohydrates added to a final concentration of 2 g L<sup>-1</sup>. Glycogen was from  
518 oyster (Sigma, G8751). Assays were performed in duplicate in 384-well plates, sealed with  
519 BreathEasy gas permeable membranes (Diversified Biotech) under anaerobic conditions.  
520 Bacterial growth was monitored by measuring the OD<sub>600</sub> at 1 h intervals for 48 h in a BioTek  
521 Epoch2 plate reader. Data are representative of at least two independent experiments performed  
522 on separate days. Data were normalized to blank (uninoculated) media. For inhibition assays,  
523 bacteria were cultivated as above, with the addition of acarbose at the indicated concentrations.  
524 Half maximal inhibitory concentrations (IC<sub>50</sub>) were calculated using growth data from each tested  
525 concentration of inhibitor taken from the time the untreated control reached stationary phase. Data  
526 were then normalized to the untreated control, and IC<sub>50</sub> values were calculated using a least  
527 squares regression (Graphpad Prism 8).

528

#### 529 *Patient CVL analysis*

530 Patient CVLs were obtained from Dr. Caroline Mitchell at Massachusetts General Hospital (IRB:  
531 2014P001066). CVLs were collected using 3 mL of sterile saline, washed over the cervix and  
532 vaginal walls with a transfer pipette, and then re-aspirated. Samples were centrifuged (10,000 x  
533 g for 10 min at 4 °C) and the supernatants were decanted and used in the assay. Purified  
534 proteins were diluted in Buffer A (50 mM HEPES, 300 mM KCl, 10% glycerol, pH 7.8) to 1 μM,  
535 then used in the assay. Human salivary amylase was purchased from Sigma Aldrich (A1031-  
536 1KU). Human amylase was detected in CVLs using an ELISA for human pancreatic amylase  
537 (Abcam ab137969) according to manufacturer's instructions. Two experimental replicates were  
538 conducted over two days, and two technical replicates of the standard curve were also  
539 measured each day.

540 Activity of CVL supernatants was determined using the EnzCheck Ultra Amylase Assay  
541 Kit (ThermoFisher, E33651). The fluorescent substrate was prepared according to the kit

542 instructions using three different buffers (20 mM sodium acetate, 0.5 mM CaCl<sub>2</sub>, pH 4.4; 20 mM  
543 sodium acetate, 0.5 mM CaCl<sub>2</sub>, pH 5.5; 20 mM MES, 0.5 mM CaCl<sub>2</sub>, pH 6.8). 10 µL of CVL  
544 supernatant was added to each well of a clear-bottom black 96-well plate and then diluted with  
545 40 µL of buffer. The reactions were initiated with 50 µL of substrate and incubated for 30 min at  
546 37 °C. Readings were taken every 51 s by monitoring an excitation of 485 nm and an emission  
547 of 528 nm. Initial rates were calculated in the plate reader software (Biotek) by determining the  
548 highest slope that covered at least 5 data points.

549 CVL cell pellets were resuspended in approximately 100 µL of filter sterilized (0.2 µM)  
550 resuspension buffer (PBS + 10 % DMSO, pH 7.2). 10 µL of sample (CVL supernatants and  
551 pellets) was added to 190 µL of 10 mg mL<sup>-1</sup> substrate (glycogen or pullulan) that had been  
552 resuspended in assay buffer (20 mM sodium acetate, 0.5 mM CaCl<sub>2</sub>, pH 5.5). The reactions were  
553 incubated at 37 °C and timepoints at 3, 5, 8, and 24 h were taken by diluting 100-fold into 9:1  
554 acetonitrile:water. Samples were further diluted 1,000-fold in LC-MS grade acetonitrile and  
555 analyzed by LC-MS as described above for the detection of maltotriose. Samples were  
556 normalized to a no enzyme control. Two experimental replicates over two days were tested for  
557 each sample.

558

#### 559 *Inhibitor screening and IC<sub>50</sub> determination for acarbose*

560 The inhibitory effect of a panel of four small-molecule inhibitors was determined using a  
561 modification of the assay above. For initial screening, enzymes were preincubated with 1 mM  
562 each inhibitor for 15 min at room temperature. For IC<sub>50</sub> analysis, enzyme (2.5-50 nM) was  
563 preincubated for 15 min at room temperature with acarbose (Abcam) ranging from 0.366 µM to  
564 3000 µM in a total volume of 50 µL. The reactions were initiated with 50 µL of substrate and  
565 incubated for 30 min at 37 °C monitoring with an excitation of 485 nm and an emission of 528 nm.  
566 Initial rates were calculated in the plate reader software (Biotek) by determining the highest slope  
567 that covered at least 8 data points. Percent activity was calculated by normalizing the activity to

568 a no inhibitor control. IC<sub>50</sub> values were calculated using a nonlinear fitting of the data to the  
569 inhibitor vs normalized response function (GraphPad Prism 8). Error associated with the IC<sub>50</sub>  
570 values represents 95% confidence intervals.

571

572 *Data Availability*

573 All raw data that support the findings of this study are available from the corresponding author  
574 upon reasonable request.

## 575 References

- 576 1. Kalia, N., Singh, J. & Kaur, M. Microbiota in vaginal health and pathogenesis of recurrent  
577 vulvovaginal infections: A critical review. *Ann. Clin. Microbiol. Antimicrob.* **19**, 1–19 (2020).
- 578 2. Ravel, J. *et al.* Vaginal microbiome of reproductive-age women. *Proc. Natl. Acad. Sci. U.*  
579 *S. A.* **108**, 4680–4687 (2011).
- 580 3. Anahtar, M. N. *et al.* Inflammatory responses in the female genital tract. *Immunity* **42**, 965–  
581 976 (2016).
- 582 4. Gosmann, C. *et al.* Lactobacillus-deficient cervicovaginal bacterial communities are  
583 associated with increased HIV acquisition in young south african women. *Immunity* **46**, 29–  
584 37 (2017).
- 585 5. Dols, J. A. M. *et al.* Microarray-based identification of clinically relevant vaginal bacteria in  
586 relation to bacterial vaginosis. *Am. J. Obstet. Gynecol.* **204**, 305.e1-305.e7 (2011).
- 587 6. Hočevár, K. *et al.* Vaginal microbiome signature is associated with spontaneous preterm  
588 delivery. *Front. Med.* **6**, 1–12 (2019).
- 589 7. Gajer, P. *et al.* Temporal dynamics of the human vaginal microbiota. *Sci. Transl. Med.* **4**,  
590 (2012).
- 591 8. Ma, B. *et al.* A comprehensive non-redundant gene catalog reveals extensive within-  
592 community intraspecies diversity in the human vagina. *Nat. Commun.* **11**, (2020).
- 593 9. Ma, B., Forney, L. J. & Ravel, J. Vaginal microbiome: Rethinking health and disease. *Annu.*  
594 *Rev. Microbiol.* **66**, 371–389 (2012).
- 595 10. Foster, K. R., Schluter, J., Coyte, K. Z. & Rakoff-Nahoum, S. The evolution of the host  
596 microbiome as an ecosystem on a leash. *Nature* **548**, 43–51 (2017).
- 597 11. Rakoff-Nahoum, S., Foster, K. R. & Comstock, L. E. The evolution of cooperation within  
598 the gut microbiota. *Nature* **533**, 255–259 (2016).
- 599 12. Porter, N. T. & Martens, E. C. The critical roles of polysaccharides in gut microbial ecology

- 600 and physiology. *Annu. Rev. Microbiol.* **71**, 349–369 (2017).
- 601 13. Rakoff-Nahoum, S., Coyne, M. J. & Comstock, L. E. An ecological network of  
602 polysaccharide utilization among human intestinal symbionts. *Curr. Biol.* **24**, 40–49 (2014).
- 603 14. Cruickshank, R. & Sharman, A. The biology of the vagina in the human subject. *BJOG An*  
604 *Int. J. Obstet. Gynaecol.* **41**, 208–226 (1934).
- 605 15. Mirmonsef, P. *et al.* Free glycogen in vaginal fluids is associated with *Lactobacillus*  
606 colonization and low vaginal pH. *PLoS One* **9**, 26–29 (2014).
- 607 16. Stewart-Tull, D. E. S. Evidence that vaginal lactobacilli do not ferment glycogen. *Am. J.*  
608 *Obstet. Gynecol.* **88**, 676–679 (1964).
- 609 17. Wylie, J. G. & Henderson, A. Identity and glycogen-fermenting ability of *Lactobacilli* isolated  
610 from the vagina of pregnant women. *J. Med. Microbiol.* **2**, 363–366 (1969).
- 611 18. Spear, G. T. *et al.* Human  $\alpha$ -amylase present in lower-genital-tract mucosal fluid processes  
612 glycogen to support vaginal colonization by *Lactobacillus*. *J. Infect. Dis.* **210**, 1019–1028  
613 (2014).
- 614 19. Spear, G. T. *et al.* Effect of pH on cleavage of glycogen by vaginal enzymes. *PLoS One*  
615 **10**, 1–10 (2015).
- 616 20. Nunn, K. L. *et al.* Amylases in the human vagina. *mSphere* **5**, 1–13 (2020).
- 617 21. Van Der Veer, C. *et al.* Comparative genomics of human *Lactobacillus crispatus* isolates  
618 reveals genes for glycosylation and glycogen degradation: Implications for in vivo  
619 dominance of the vaginal microbiota. *Microbiome* **7**, 1–14 (2019).
- 620 22. Qiao, Y. *et al.* Gene cloning and enzymatic characterization of alkali-tolerant type I  
621 pullulanase from *Exiguobacterium acetylicum*. *Lett. Appl. Microbiol.* **60**, 52–59 (2015).
- 622 23. Von Heijne, G. The signal peptide. *J. Membr. Biol.* **115**, 195–201 (1990).
- 623 24. Bhandari, P., Tingley, J. P., Abbott, D. W. & Hill, J. E. Characterization of an  $\alpha$ -glucosidase  
624 enzyme conserved in *Gardnerella* spp. isolated from the human vaginal microbiome.  
625 Preprint at <http://biorxiv.org/content/early/2020/09/01/2020.05.11.086124>. (2020).

- 626 25. Boot, H. J., Kolen, C. P. A. M. & Pouwels, P. H. Identification, cloning, and nucleotide  
627 sequence of a silent S-layer protein gene of *Lactobacillus acidophilus* ATCC 4356 which  
628 has extensive similarity with the S-layer protein gene of this species. *J. Bacteriol.* **177**,  
629 7222–7230 (1995).
- 630 26. Willing, S. E. *et al.* Clostridium difficile surface proteins are anchored to the cell wall using  
631 CWB2 motifs that recognise the anionic polymer PSII. *Mol. Microbiol.* **96**, 596–608 (2015).
- 632 27. Krogh, A., Larsson, B., Von Heijne, G. & Sonnhammer, E. L. L. Predicting transmembrane  
633 protein topology with a hidden Markov model: Application to complete genomes. *J. Mol.*  
634 *Biol.* **305**, 567–580 (2001).
- 635 28. Cantarel, B. I. *et al.* The Carbohydrate-Active EnZymes database (CAZy): An expert  
636 resource for glyco-genomics. *Nucleic Acids Res.* **37**, 20894 (2009).
- 637 29. El-Gebali, S. *et al.* The Pfam protein families database in 2019. *Nucleic Acids Res.* **47**,  
638 D427–D432 (2019).
- 639 30. Boraston, A. B. *et al.* A structural and functional analysis of  $\alpha$ -glucan recognition by family  
640 25 and 26 carbohydrate-binding modules reveals a conserved mode of starch recognition.  
641 *J. Biol. Chem.* **281**, 587–598 (2006).
- 642 31. Wiatrowski, H. A. *et al.* Mutations in the Gal83 glycogen-binding domain activate the  
643 Snf1/Gal83 kinase pathway by a glycogen-independent mechanism. *Mol. Cell. Biol.* **24**,  
644 352–361 (2004).
- 645 32. Michelin, M. *et al.* Purification and biochemical characterization of a thermostable  
646 extracellular glucoamylase produced by the thermotolerant fungus *Paecilomyces variotii*.  
647 *J. Ind. Microbiol. Biotechnol.* **35**, 17–25 (2008).
- 648 33. Da Silva, T. M. *et al.* Purification and biochemical characterization of a novel  $\alpha$ -glucosidase  
649 from *Aspergillus niveus*. *Antonie van Leeuwenhoek, Int. J. Gen. Mol. Microbiol.* **96**, 569–  
650 578 (2009).
- 651 34. Li, Y., Zhang, L., Ding, Z., Gu, Z. & Shi, G. Engineering of isoamylase: Improvement of

- 652 protein stability and catalytic efficiency through semi-rational design. *J. Ind. Microbiol.*  
653 *Biotechnol.* **43**, 3–12 (2016).
- 654 35. Jung, J. H. *et al.* Characterization of a novel extracellular  $\alpha$ -amylase from *Ruminococcus*  
655 *bromii* ATCC 27255 with neopullulanase-like activity. *Int. J. Biol. Macromol.* **130**, 605–614  
656 (2019).
- 657 36. Lee, H. W. *et al.* Characterization and application of BiLA, a psychrophilic  $\alpha$ -amylase from  
658 *Bifidobacterium longum*. *J. Agric. Food Chem.* **64**, 2709–2718 (2016).
- 659 37. Marie S. Møller, A. *et al.* An extracellular cell-attached pullulanase confers branched  $\alpha$ -  
660 glucan utilization in human gut *Lactobacillus acidophilus*. *Appl. Environ. Microbiol.* **83**, 1–  
661 13 (2017).
- 662 38. Nisha, M. & Satyanarayana, T. Recombinant bacterial amylopullulanases: Developments  
663 and perspectives. **4**, 388–400 (2013).
- 664 39. Lin, F. P. & Leu, K. L. Cloning, expression, and characterization of thermostable region of  
665 amylopullulanase gene from *Thermoanaerobacter ethanolicus* 39E. *Appl. Biochem.*  
666 *Biotechnol. - Part A Enzym. Eng. Biotechnol.* **97**, 33–44 (2002).
- 667 40. Amsel, R. *et al.* Nonspecific vaginitis. Diagnostic criteria and microbial and epidemiologic  
668 associations. *Am. J. Med.* **74**, 14–22 (1983).
- 669 41. Nisha, M. & Satyanarayana, T. Characterization of recombinant amylopullulanase (gt-apu)  
670 and truncated amylopullulanase (gt-apuT) of the extreme thermophile *Geobacillus*  
671 *thermoleovorans* NP33 and their action in starch saccharification. *Appl. Microbiol.*  
672 *Biotechnol.* **97**, 6279–6292 (2013).
- 673 42. Yilmazer-Musa, M., M. Griffith, A., Michels, A. J., Schneider, E. & Frei, B. Inhibition of  $\alpha$ -  
674 amylase and  $\alpha$ -glucosidase activity by tea and grape seed extracts and their constituent  
675 catechins. *Physiol. Behav.* **176**, 139–148 (2017).
- 676 43. Coyte, K. Z. & Rakoff-Nahoum, S. Understanding competition and cooperation within the  
677 mammalian gut microbiome. *Curr. Biol.* **29**, R538–R544 (2019).

- 678 44. Nielsen, J. E., Borchert, T. V. & Vriend, G. The determinants of  $\alpha$ -amylase pH-activity  
679 profiles. *Protein Eng.* **14**, 505–512 (2001).
- 680 45. Markowitz, V. M. *et al.* IMG: The integrated microbial genomes database and comparative  
681 analysis system. *Nucleic Acids Res.* **40**, 115–122 (2012).
- 682 46. Almagro Armenteros, J. J. *et al.* SignalP 5.0 improves signal peptide predictions using deep  
683 neural networks. *Nat. Biotechnol.* **37**, 420–423 (2019).
- 684
